# Supplementary material for: Fluoxetine Enhances Synaptic Vesicle Trafficking and Energy Metabolism in the Hippocampus of Socially Isolated Rats
Source: MDPI journal article supplement (doi:10.3390/ijms232315351), 2022-12-05

**Supplementary Figure S1.** Full-length Western blot (WB) images represented in Figure 4 in controls+vehicle (Con), fluoxetine-treated controls (Con+ Flx), chronic social isolation (CSIS) and fluoxetine-treated CSIS (CSIS + Flx) rats.

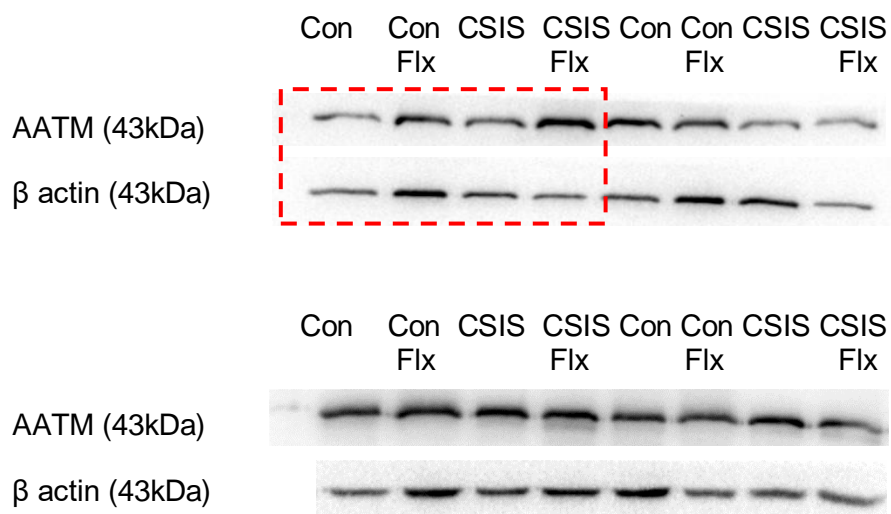

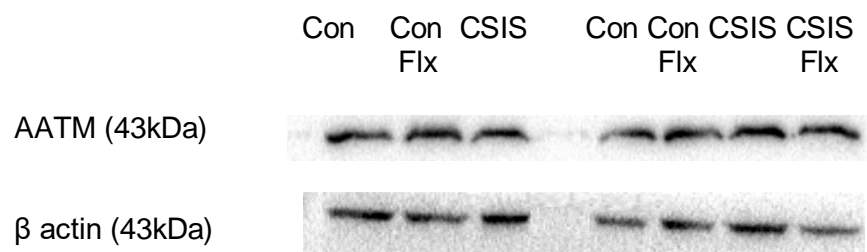

### WB Hsp90 alpha/ $\beta$ actin

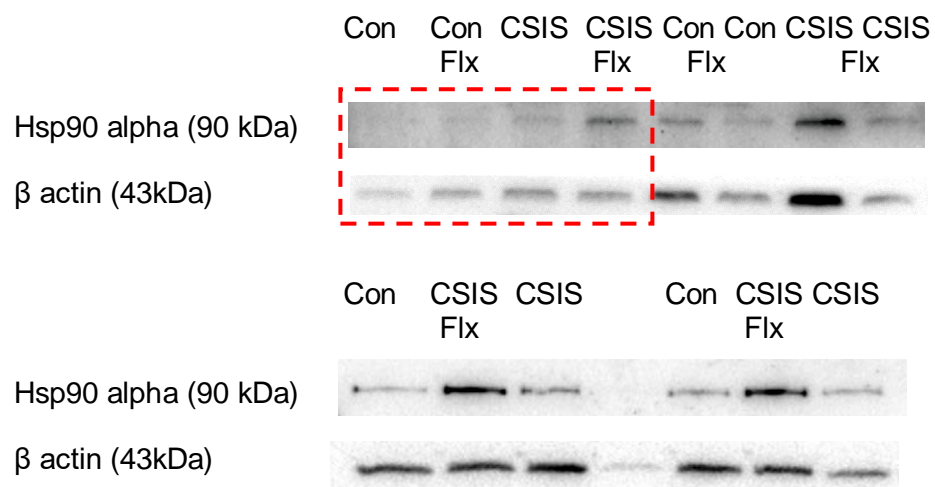

Supplement: s1 [file s1]
